# Supplementary material for: Super Aging in South Korea Unstoppable but Mitigatable: A Sub-National Scale Population Projection for Best Policy Planning
Source: PubMed Central journal article supplement (PMC8248505; doi:10.1007/s40980-020-00061-8), 2020-06-12

# Aging of South Korea in 2020

- Aging society (Aging rate  $\leq 14\%$ )
- Aged society (Aging rate 14 ~ 21%)
- Super-aged society (Aging rate  $> 21\%$ )

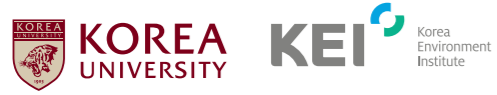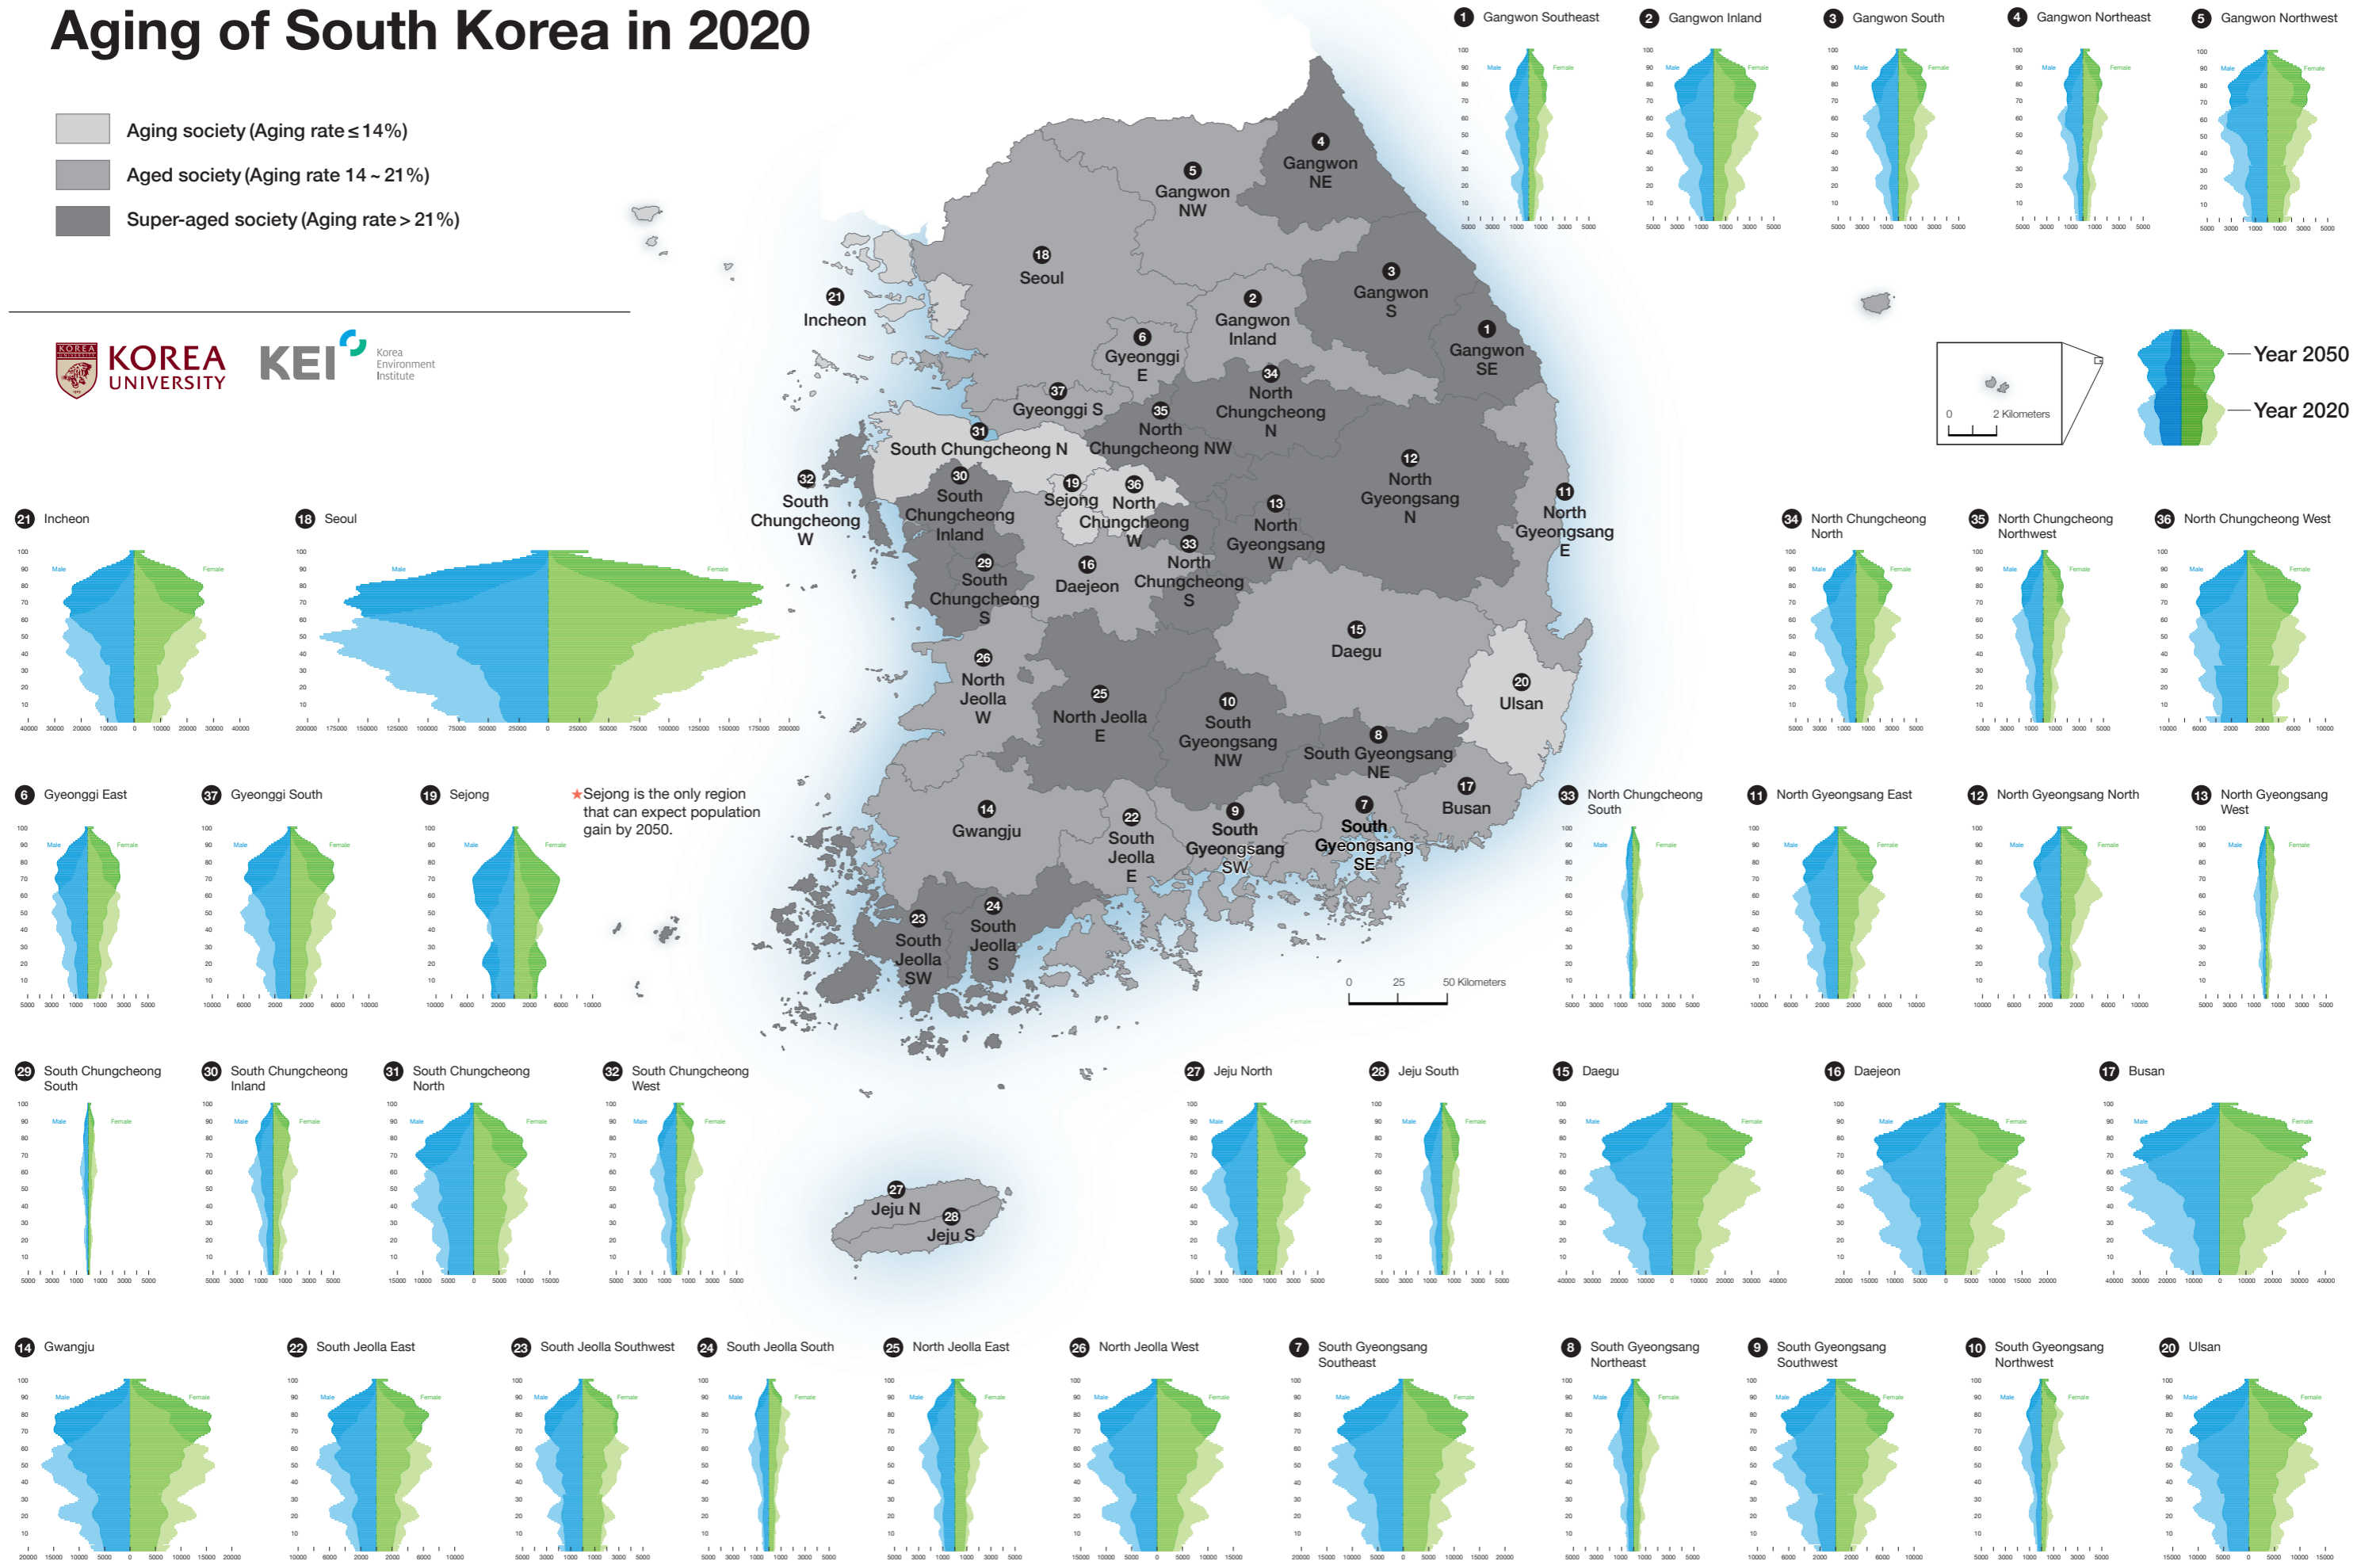

★Sejong is the only region that can expect population gain by 2050.

# Total Population Change (2020 ~ 2050)

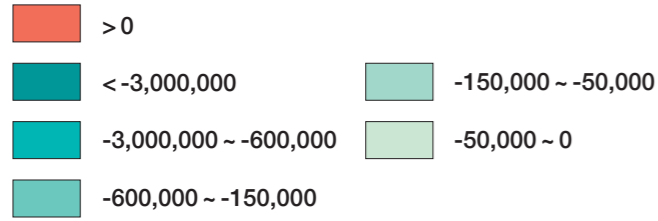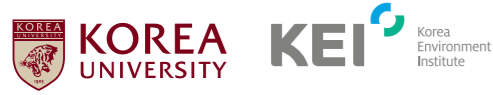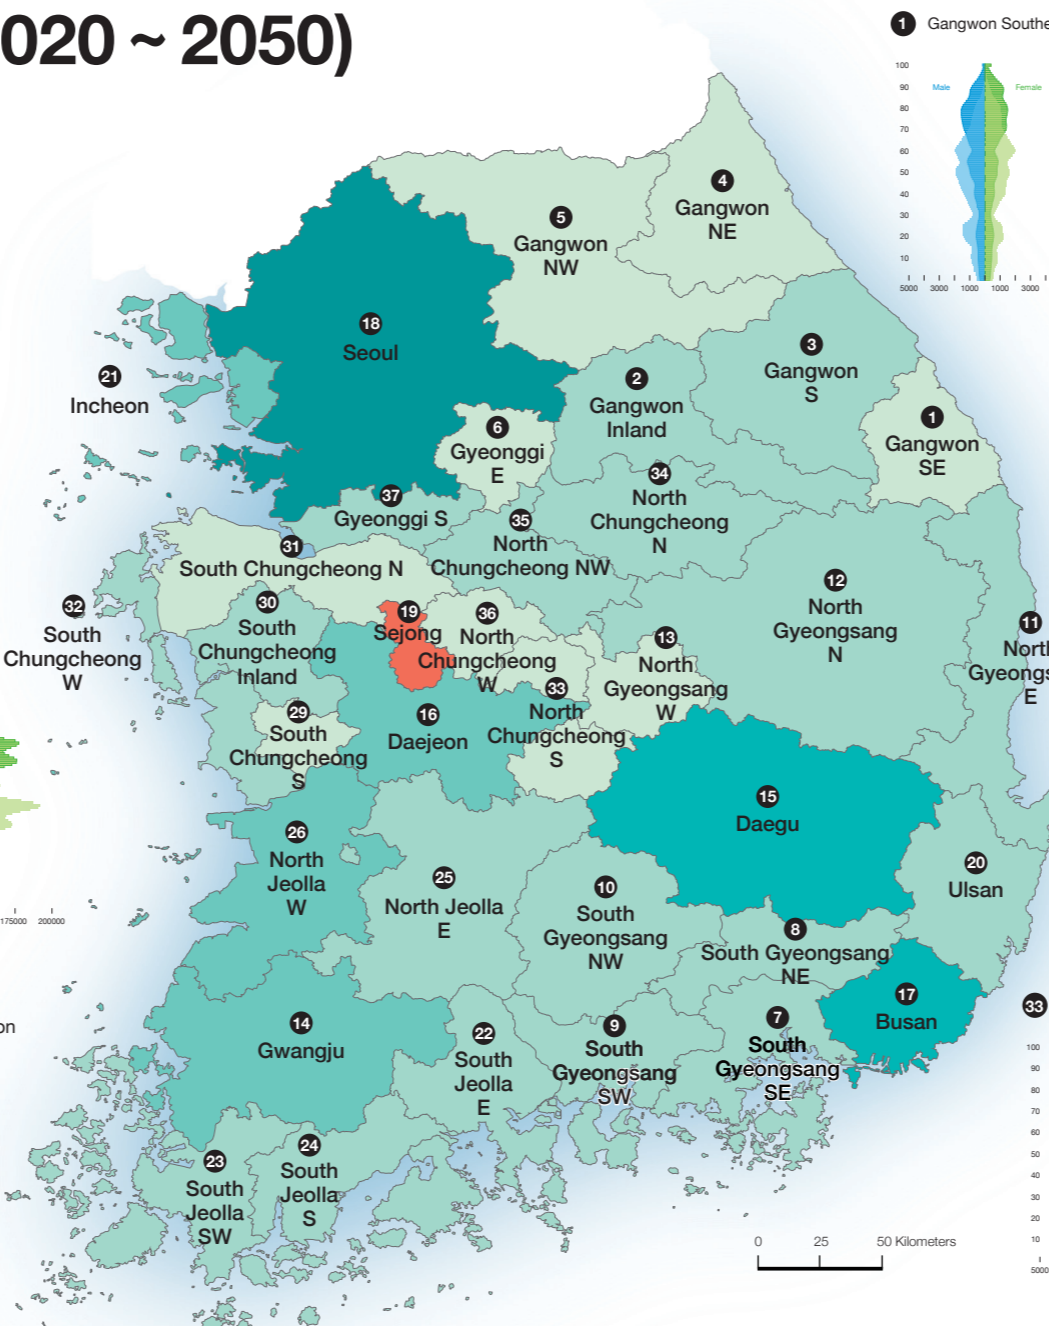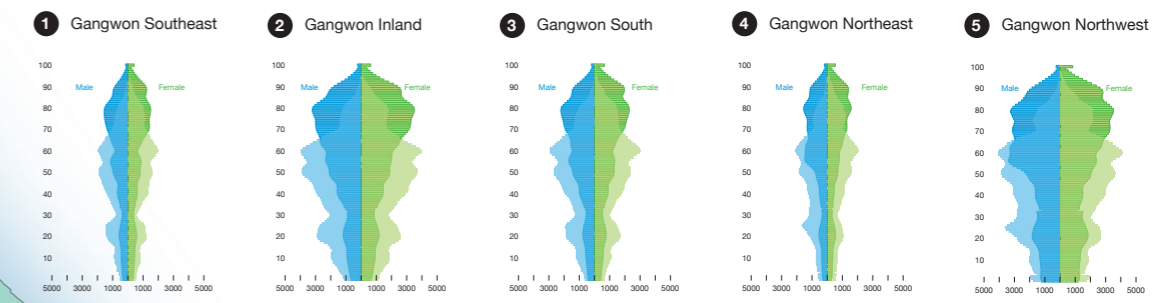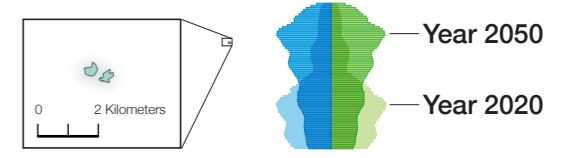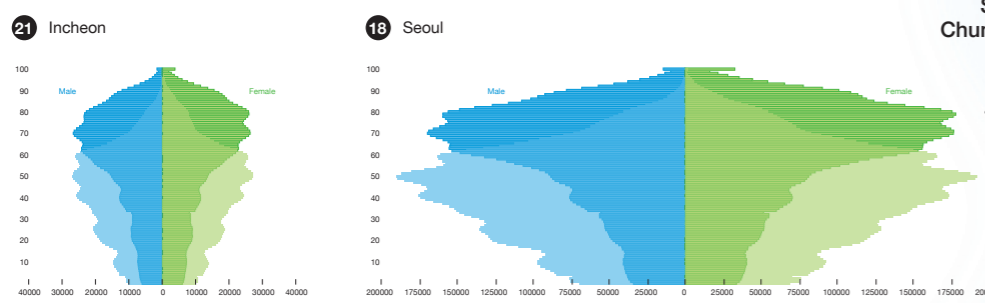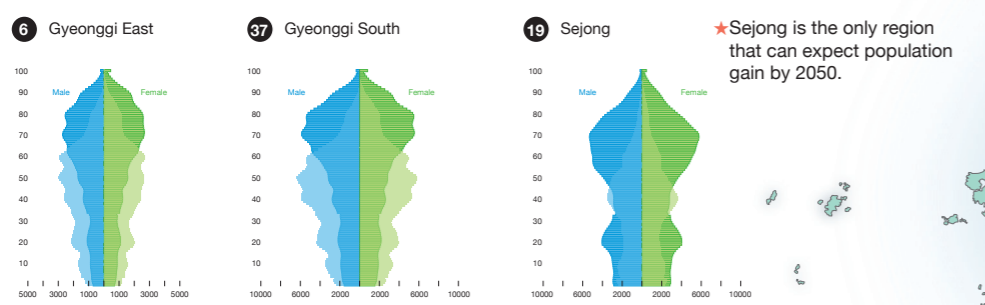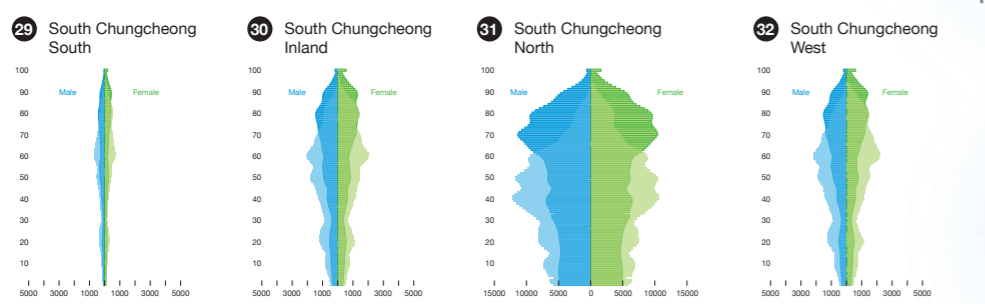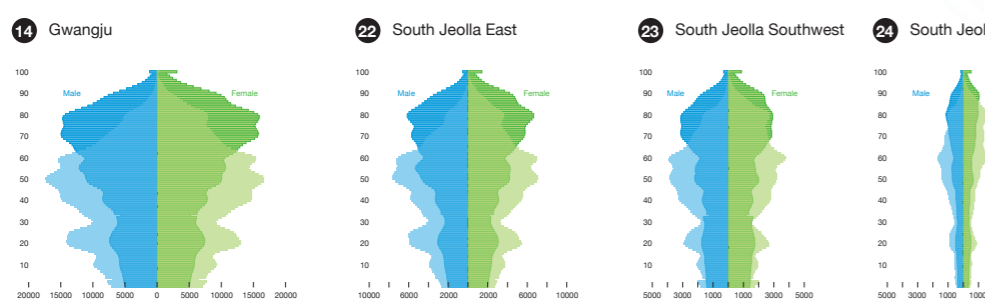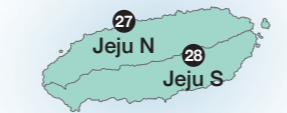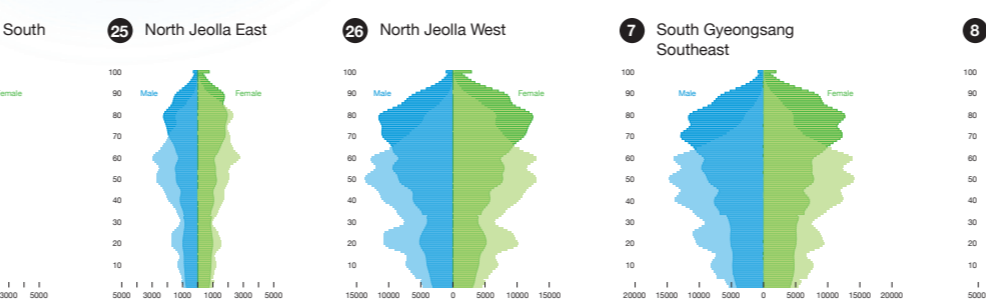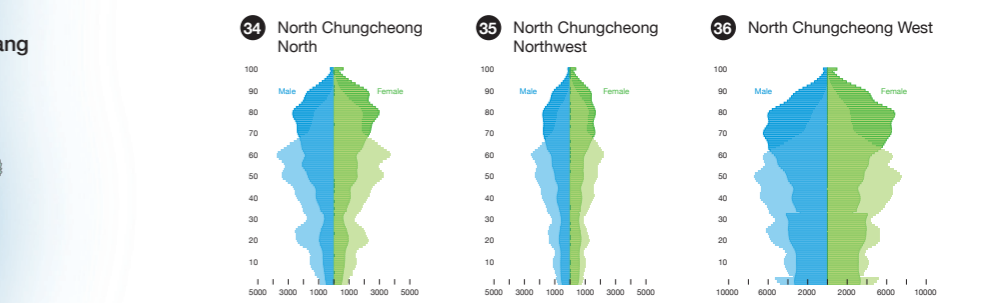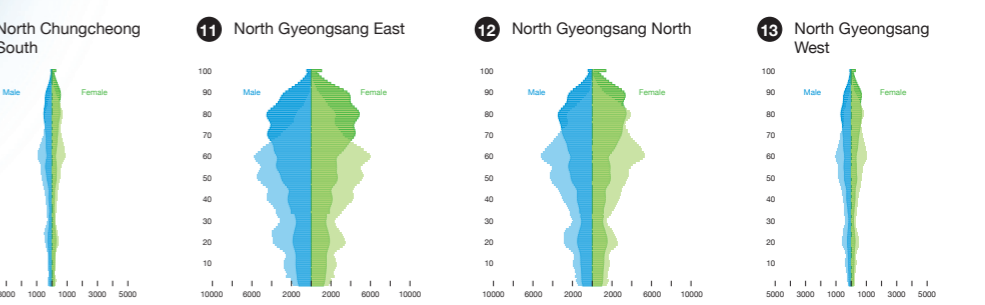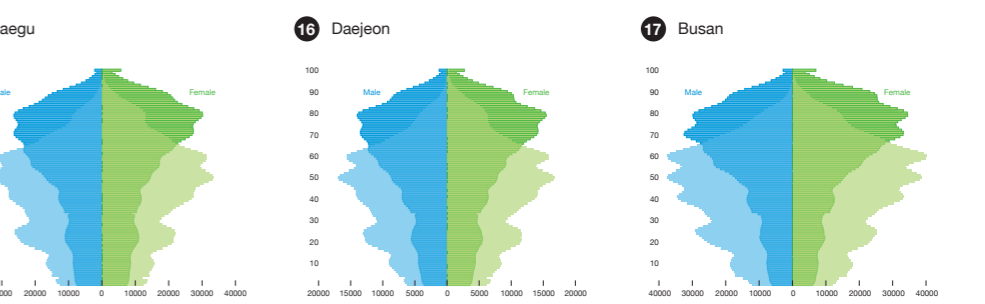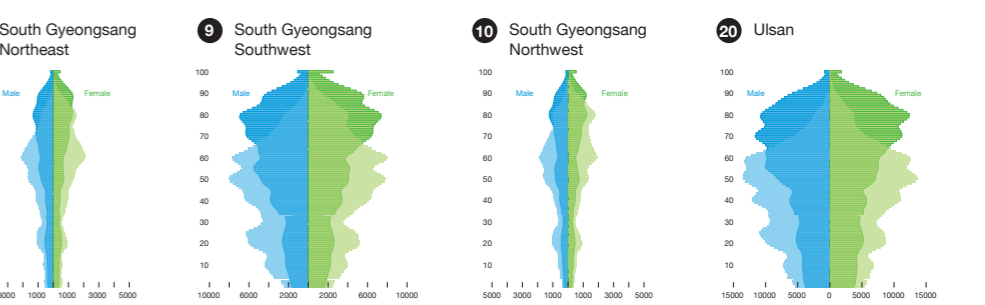

# Senior Population Change (2020 ~ 2050)

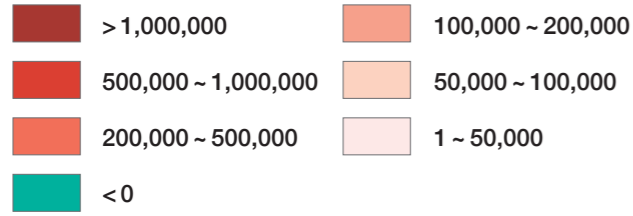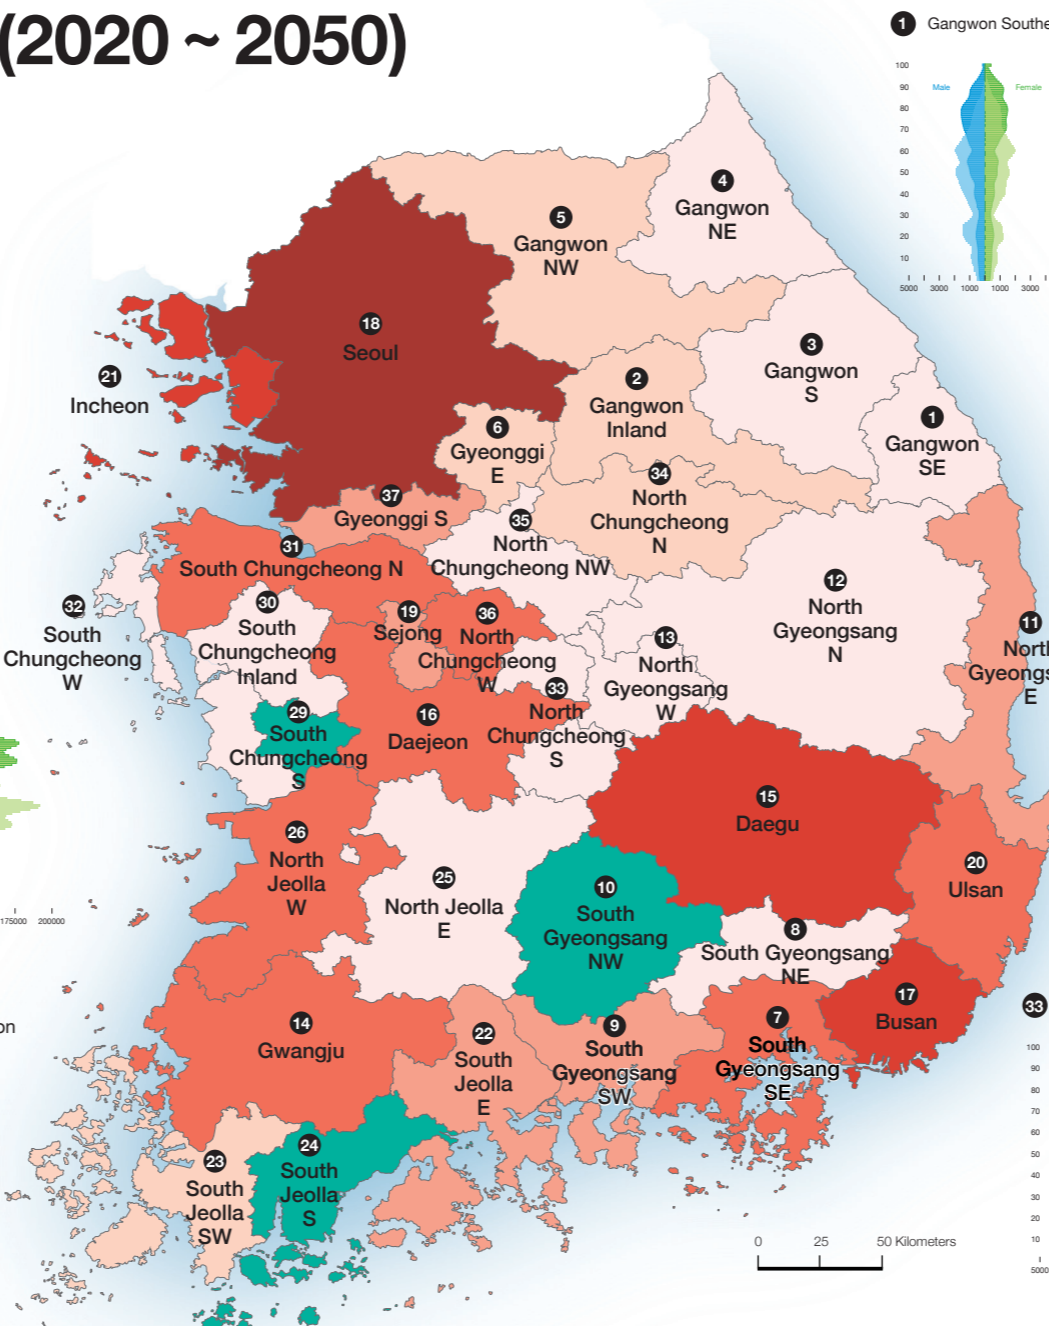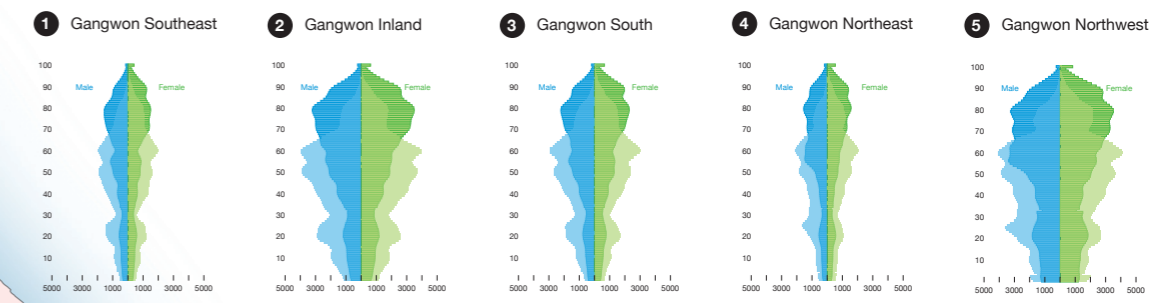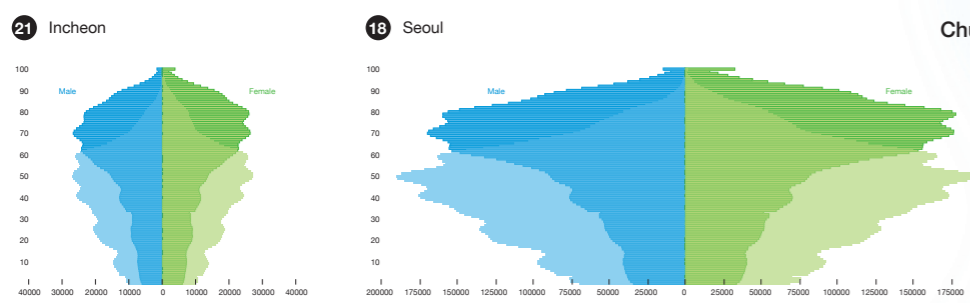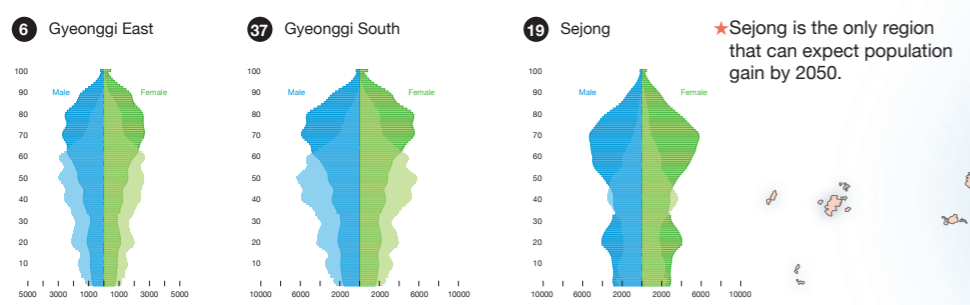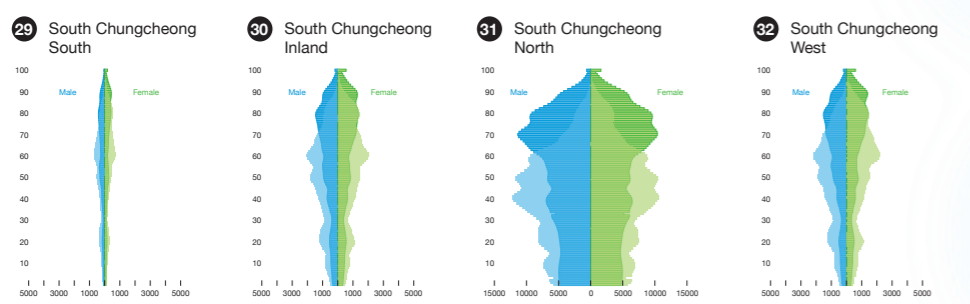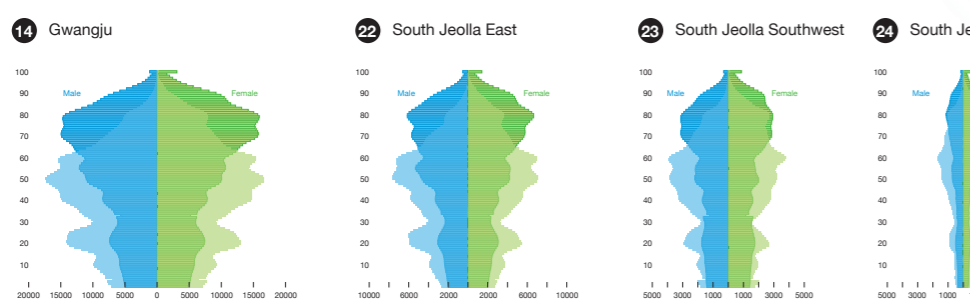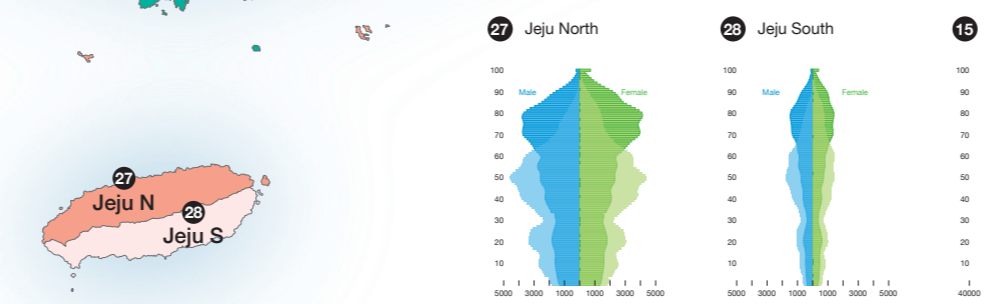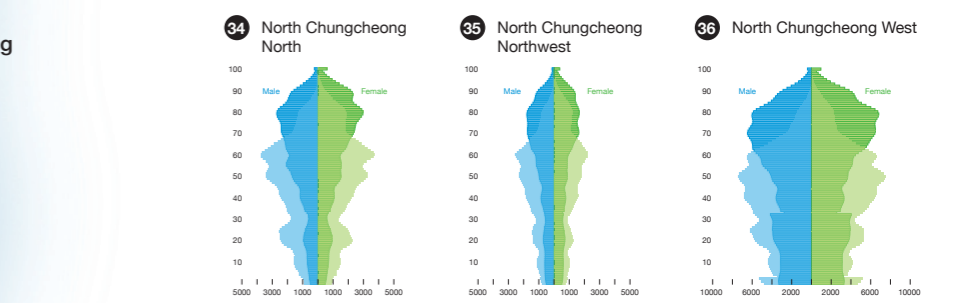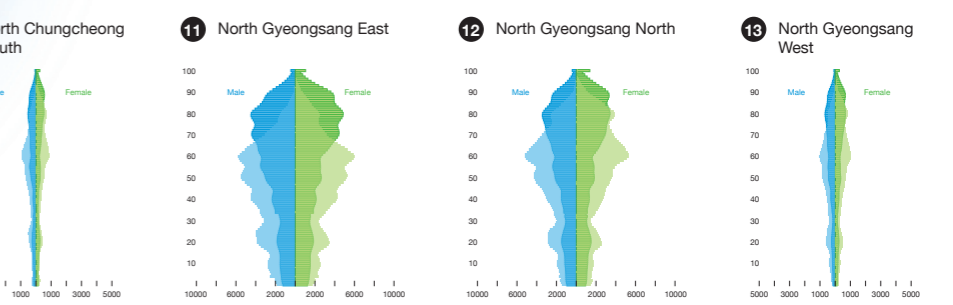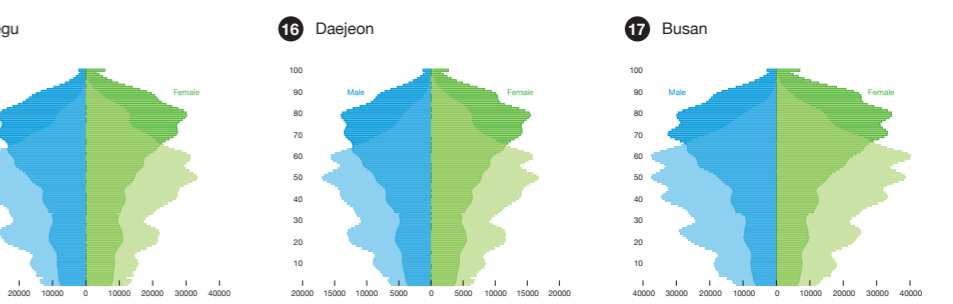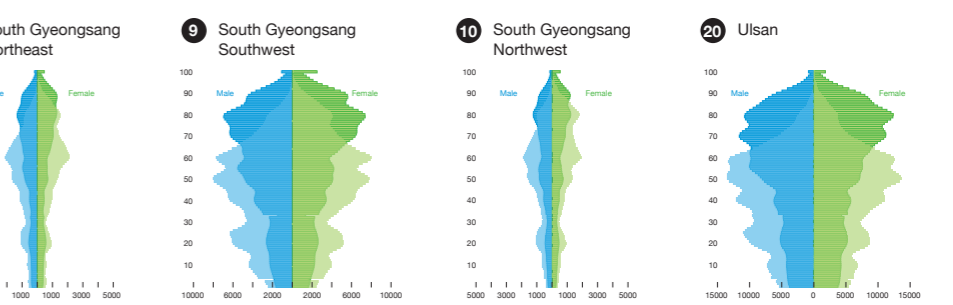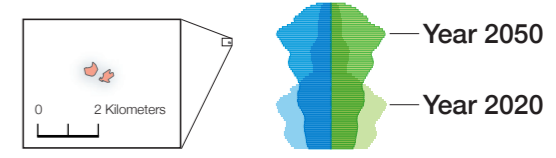

Supplement: NIHMS1610115-supplement-ESM.pdf [file NIHMS1610115-supplement-ESM.pdf]
